# Supplementary material for: Infantile spasms related to a 5q31.2-q31.3 microdeletion including PURA
Source: PubMed Central journal article supplement — Hum Genome Var. 2018 Mar 29;5:18007–. doi: 10.1038/hgv.2018.7 (PMC5874397; doi:10.1038/hgv.2018.7), 2018-03-29
Supplement: hgv20187-s2.pdf [file hgv20187-s2.pdf]

# Supplemental Fig. S2.

## The result of FISH analyses

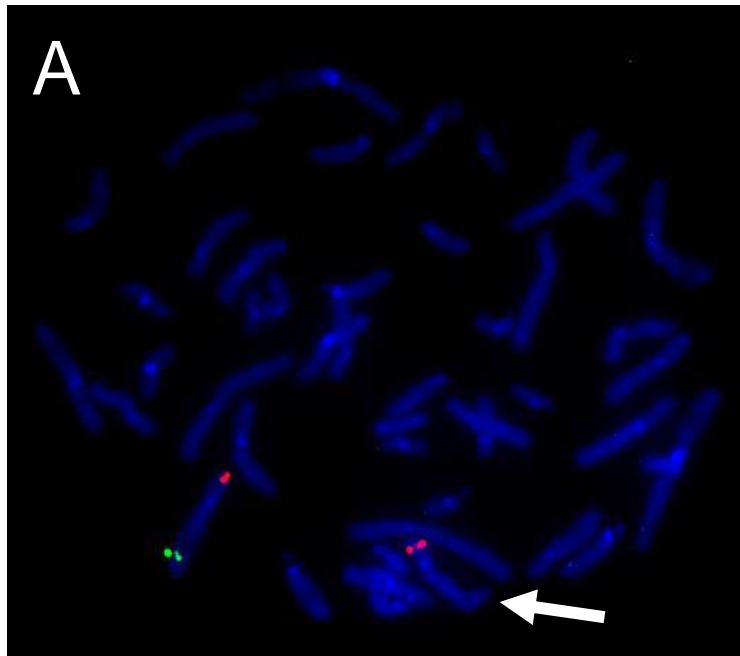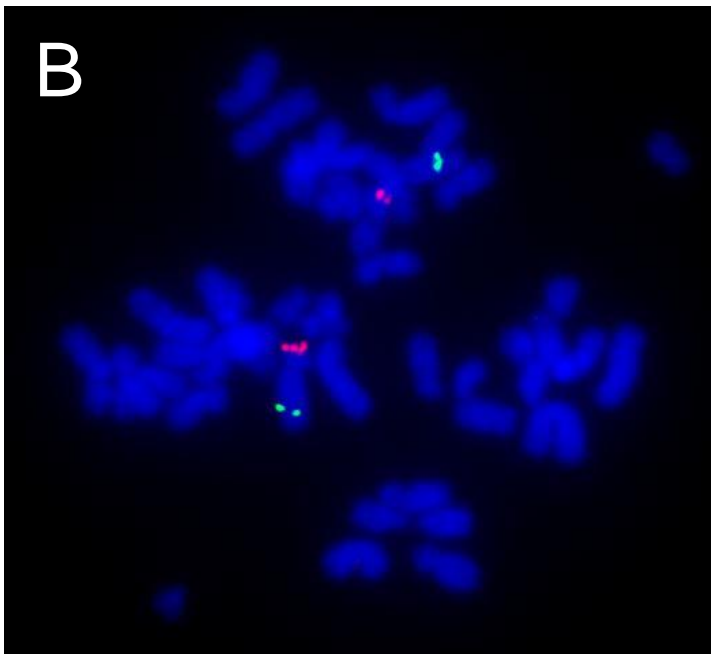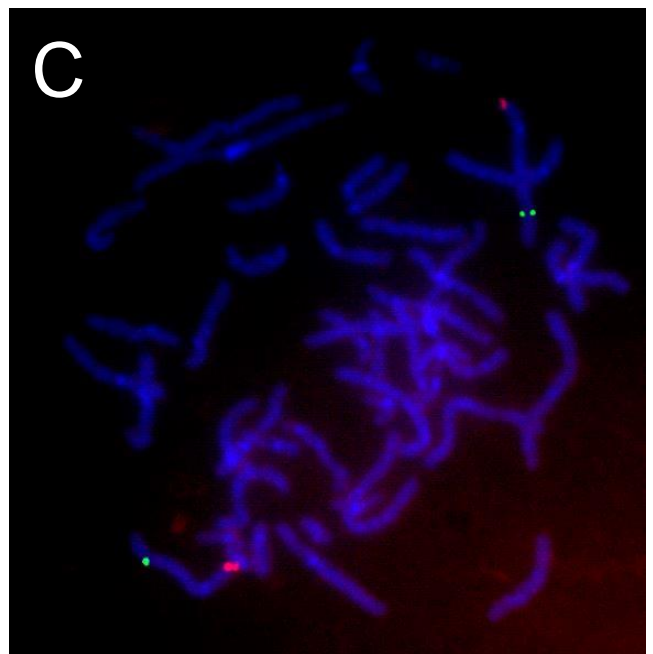

The red signals labelled for RP11-78J2 (5p15.32:5,760,940-5,917,401) are used as markers. The green signals labelled for RP11-678N8 (5q31.2:138,944,793-139,148,607) are used as the targets. The proband (A) shows the deletion in one of the chromosome 5. Two green signals are shown in the father (B) and the mother (C).
